# Supplementary material for: Selective Arcing Electrostatically Eradicates Rice Weevils in Rice Grains
Source: MDPI journal article supplement (doi:10.3390/insects12060522), 2021-06-04
Supplement: s1 [file s1]

**Table S1.** The different cells used to assess the behavior of adult rice weevils in rice grains

| Cells used          | Size of cell                    |                | Volume (cm <sup>3</sup> )<br>of each cell | Number of<br>cells used <sup>a</sup> | Amounts (g) of<br>rice grains <sup>b</sup> | Number of<br>insects <sup>b</sup> |
|---------------------|---------------------------------|----------------|-------------------------------------------|--------------------------------------|--------------------------------------------|-----------------------------------|
|                     | base area<br>(cm <sup>2</sup> ) | Height<br>(cm) |                                           |                                      |                                            |                                   |
| I <sup>2</sup> S-1H | 1 × 1                           | 1              | 1                                         | 900                                  | 738                                        | 70                                |
| I <sup>2</sup> S-2H | 1 × 1                           | 2              | 2                                         | 900                                  | 1476                                       | 140                               |
| I <sup>2</sup> S-3H | 1 × 1                           | 3              | 3                                         | 900                                  | 2214                                       | 220                               |
| I <sup>2</sup> S-5H | 1 × 1                           | 5              | 5                                         | 900                                  | 3690                                       | 360                               |
| 2 <sup>2</sup> S-2H | 2 × 2                           | 2              | 8                                         | 225                                  | 1640                                       | 160                               |
| 2 <sup>2</sup> S-3H | 2 × 2                           | 3              | 12                                        | 225                                  | 2460                                       | 240                               |
| 2 <sup>2</sup> S-5H | 2 × 2                           | 5              | 20                                        | 225                                  | 3690                                       | 360                               |
| 3 <sup>2</sup> S-3H | 3 × 3                           | 3              | 27                                        | 100                                  | 2214                                       | 220                               |
| 3 <sup>2</sup> S-5H | 3 × 3                           | 5              | 45                                        | 100                                  | 3690                                       | 360                               |
| 5 <sup>2</sup> S-5H | 5 × 5                           | 5              | 125                                       | 36                                   | 3690                                       | 360                               |

<sup>a</sup> Cells of the same size were pasted together onto a polypropylene board (30 × 30 cm<sup>2</sup>).

<sup>b</sup> Designated amounts of rice grains (*Oryza sativa* L., Yumepirica; short-grain type) containing the specified number of weevils were distributed evenly among all cells on a plate.
